# Supplementary material
Source: publisher site journal article supplement (https://www.dovepress.com/article/356662)
Supplement: Supplementary file 1 [file get_supplementary_file.php]

| **Supplementary Table 1. Etiological distribution in the two groups** | | | | |  |  |  |  |  |  |  |  |  |  |  | |
| --- | --- | --- | --- | --- | --- | --- | --- | --- | --- | --- | --- | --- | --- | --- | --- | --- |
| Case | Age, year | Sex | Immunocompromised | Bacteria identified by CMT | Fungi identified by CMT | Viruses identified by CMT | Other pathogens identified by CMT | Bacteria identified by mNGS | reads | Relative abundance% | Fungi identified by mNGS | reads | Relative abundance% | Viruses identified by mNGS | reads | Relative abundance% | |
| Pt1 | 55 | male | yes |  |  |  |  | staphylococcus aureus | 201 | 3.1 | Pneumocystis carinii and Aspergillus flavus | 83 and 216 | 33.4 and 54.1 | none | none | none | |
| matching Pt1.1 | 56 | male | yes | Escherichia coli | none | none | none |  |  |  |  |  |  |  |  |  | |
| matching Pt1.2 | 56 | male | yes | MARSA | none | none | none |  |  |  |  |  |  |  |  |  | |
| Pt2 | 54 | female | no |  |  |  |  | Roseburia | 5380 | 58.04 | Candida albicans | 284 | 97.66 | none | none | none | |
| matching Pt2.1 | 55 | female | no | Negative | none | none | none |  |  |  |  |  |  |  |  |  | |
| matching Pt2.2 | 55 | female | no | Acinetobacter baumannii | Candida albicans | none | none |  |  |  |  |  |  |  |  |  | |
| Pt3 | 48 | female | yes |  |  |  |  | Actinobacteria | 2370 | 78.6 | none | none | none | none | none | none | |
| matching Pt3.1 | 46 | female | yes | Negative | none | EBV | none |  |  |  |  |  |  |  |  |  | |
| matching Pt3.2 | 46 | female | yes | Negative | none | none | none |  |  |  |  |  |  |  |  |  | |
| Pt4 | 56 | male | yes |  |  |  |  | Klebsiella pneumoniae | 67830 | 88.74 | none | none | none | none | none | none | |
| matching Pt4.1 | 59 | male | yes | Negative | none | none | none |  |  |  |  |  |  |  |  |  | |
| matching Pt4.2 | 57 | male | yes | Acinetobacter baumannii | none | none | none |  |  |  |  |  |  |  |  |  | |
| Pt5 | 52 | female | yes |  |  |  |  | Acinetobacter baumannii | 1085 | 44.57 | none | none | none | none | none | none | |
| matching Pt5.1 | 52 | female | yes | Negative | none | none | none |  |  |  |  |  |  |  |  |  | |
| matching Pt5.2 | 51 | female | yes | Negative | Candida glabrata | none | none |  |  |  |  |  |  |  |  |  | |
| Pt6 | 65 | male | no |  |  |  |  | Pseudomonas aeruginosa | 15939 | 95.32 | none | none | none | EBV | 17 |  | |
| matching Pt6.1 | 65 | male | no | Klebsiella pneumoniae | none | EBV | none |  |  |  |  |  |  |  |  |  | |
| matching Pt6.2 | 65 | male | no | Pseudomonas aeruginosa | none | none | none |  |  |  |  |  |  |  |  |  | |
| Pt7 | 74 | female | no |  |  |  |  | H. influenzae | 8503 | 77.89 | none | none | none | none | none | none | |
| matching Pt7.1 | 73 | female | no | Negative | none | none | none |  |  |  |  |  |  |  |  |  | |
| matching Pt7.2 | 73 | female | no | Negative | none | none | none |  |  |  |  |  |  |  |  |  | |
| Pt8 | 71 | male | no |  |  |  |  | P.oralis | 45 | 1.74 | none | none | none | none | none | none | |
| matching Pt8.1 | 70 | male | no | Stenotrophomonas maltophilia | none | CMV | none |  |  |  |  |  |  |  |  |  | |
| matching Pt8.2 | 70 | male | no | Acinetobacter baumannii | none | none | none |  |  |  |  |  |  |  |  |  | |
| Pt9 | 58 | male | no |  |  |  |  | Negative | none | none | none | none | none | none | none | none | |
| matching Pt9.1 | 58 | male | no | Pseudomonas aeruginosa and Acinetobacter baumannii | none | none | none |  |  |  |  |  |  |  |  |  | |
| matching Pt9.2 | 57 | male | no | Acinetobacter baumannii | none | none | none |  |  |  |  |  |  |  |  |  | |
| Pt10 | 36 | male | yes |  |  |  |  | Stenotrophomonas maltophilia | 3 | 0.46 | Pneumocystis carinii | 13503 | 96.03 | none | none | none | |
| matching Pt10.1 | 36 | male | yes | Negative | none | CMV | none |  |  |  |  |  |  |  |  |  | |
| matching Pt10.2 | 37 | male | yes | Klebsiella pneumoniae | Aspergillus fumigatus | none | none |  |  |  |  |  |  |  |  |  | |
| Pt11 | 82 | male | no |  |  |  |  | Acinetobacter baumannii | 82 | 37.43 | Aspergillus fumigatus | 17 | 85.4 | Human parainfluenza virus 3 | 28 |  | |
| matching Pt11.1 | 82 | male | no | Klebsiella pneumoniae | none | none | none |  |  |  |  |  |  |  |  |  | |
| matching Pt11.2 | 82 | male | no | Negative | none | none | none |  |  |  |  |  |  |  |  |  | |
| Pt12 | 67 | male | no |  |  |  |  | staphylococcus aureus and Stenotrophomonas maltophilia | 516 and 423 and 396 | 35.62 and 32.14 and 30.57 | none | none | none | none | none | none | |
| matching Pt12.1 | 68 | male | no | Klebsiella pneumoniae | Candida glabrata | none | none |  |  |  |  |  |  |  |  |  | |
| matching Pt12.2 | 66 | male | no | Streptococcus pneumoniae | none | none | none |  |  |  |  |  |  |  |  |  | |
| Pt13 | 78 | male | no |  |  |  |  | Acinetobacter baumannii | 150 | 9.83 | none | none | none | HSV1 and CMV | 19 and 3 | none | |
| matching Pt13.1 | 79 | male | no | Negative | Candida albicans | none | none |  |  |  |  |  |  |  |  |  | |
| matching Pt13.2 | 78 | male | no | Negative | none | none | none | Acinetobacter baumannii and Klebsiella pneumoniae | 99 and 1707 | 5.79 and 55.3 |  |  |  | CMV and HSV1 | 3535 and 52 |  | |
| Pt14 | 55 | female | yes |  |  |  |  |  |  |  |  |  |  |  |  |  | |
| matching Pt14.1 | 53 | female | yes | Acinetobacter baumannii | none | none | none |  |  |  |  |  |  |  |  |  | |
| matching Pt14.2 | 54 | female | yes | Negative | none | none | none |  |  |  |  |  |  |  |  |  | |
| Pt15 | 45 | male | no |  |  |  |  | Acinetobacter baumannii | 97556 | 99.75 | none | none | none | HSV1 | 223 | none | |
| matching Pt15.1 | 46 | male | no | serratia marcescens and Stenotrophomonas maltophilia | none | EBV | none |  |  |  |  |  |  |  |  |  | |
| matching Pt15.2 | 46 | male | no | Escherichia coli | none | none | none |  |  |  |  |  |  |  |  |  | |
| Pt16 | 79 | male | no |  |  |  |  | Acinetobacter baumannii | 6337 | 45.3 | Candida albicans | 170 | 98.8 | HSV1 | 78 |  | |
| matching Pt16.1 | 80 | male | no | Acinetobacter baumannii and Pseudomonas aeruginosa |  |  |  |  |  |  |  |  |  |  |  |  | |
| matching Pt16.2 | 79 | male | no | Negative | Candida glabrata |  | none |  |  |  |  |  |  |  |  |  | |
| Pt17 | 69 | male | no |  |  |  |  | Acinetobacter baumannii | 2888 | 77.34 | Candida glabrata | 16 | 32.6 | none | none | none | |
| matching Pt17.1 | 68 | male | no | Acinetobacter baumannii | none | none | none |  |  |  |  |  |  |  |  |  | |
| matching Pt17.2 | 69 | male | no | Acinetobacter baumannii | none | none | none |  |  |  |  |  |  |  |  |  | |
| Pt18 | 72 | female | yes |  |  |  |  | Actinobacteria | 649 | 18.86 | none | none | none | Primate erythroparvovirus 1 | 7 | none | |
| matching Pt18.1 | 72 | female | yes | Negative | Aspergillus flavus | none | none |  |  |  |  |  |  |  |  |  | |
| matching Pt18.2 | 73 | female | yes | Acinetobacter baumannii | Canidia albicans | none | none |  |  |  |  |  |  |  |  |  | |
| Pt19 | 85 | male | no |  |  |  |  | Klebsiella pneumoniae | 34324 | 99.23 | none | none | none | none | none | none | |
| matching Pt19.1 | 85 | male | no | Klebsiella pneumoniae | none | CMV | none |  |  |  |  |  |  |  |  |  | |
| matching Pt19.2 | 85 | male | no | MARSA | none | none | none |  |  |  |  |  |  |  |  |  | |
| Pt20 | 78 | male | no |  |  |  |  | Acinetobacter baumannii | 221463 | 98.34 | none | none | none | none | none | none | |
| matching Pt20.1 | 78 | male | no | Negative | none | none | none |  |  |  |  |  |  |  |  |  | |
| matching Pt20.2 | 79 | male | no | Negative | none | none | none |  |  |  |  |  |  |  |  |  | |
| Pt21 | 53 | male | no |  |  |  |  | Klebsiella pneumoniae | 58946 | 99.24 | none | none | none | none | none | none | |
| matching Pt21.1 | 55 | male | no | Negative | Canidia albicans | none | none |  |  |  |  |  |  |  |  |  | |
| matching Pt21.2 | 55 | male | no | Negative | none | none | none |  |  |  |  |  |  |  |  |  | |
| Pt22 | 78 | female | yes |  |  |  |  | Klebsiella pneumoniae | 1027 | 39.81 | none | none | none | Human herpes virus 6B | 119 |  | |
| matching Pt22.1 | 77 | female | yes | MSSA | none | none | none |  |  |  |  |  |  |  |  |  | |
| matching Pt22.2 | 78 | female | yes | Klebsiella pneumoniae and Acinetobacter baumannii | none | none | none |  |  |  |  |  |  |  |  |  | |
| Pt23 | 78 | male | no |  |  |  |  | Klebsiella pneumoniae | 18329 | 90.25 | Aspergillus flavus and Pneumocystis carinii | 32 and 6 | 34.6 and 26.3 | none | none | none | |
| matching Pt23.1 | 78 | male | no | Acinetobacter baumannii | none | none | none |  |  |  |  |  |  |  |  |  | |
| matching Pt23.2 | 80 | male | no | Klebsiella pneumoniae | none | none | none |  |  |  |  |  |  |  |  |  | |
| Pt24 | 76 | male | no |  |  |  |  | Escherichia coli | 3684 | 12.54 | Aspergillus fumigatus | 5 | 43.2 | none | none | none | |
| matching Pt24.1 | 75 | male | no | Acinetobacter baumannii | none | none | none |  |  |  |  |  |  |  |  |  | |
| matching Pt24.2 | 77 | male | no | Pseudomonas aeruginosa and Stenotrophomonas maltophilia | none | none | none |  |  |  |  |  |  |  |  |  | |
| Pt25 | 37 | male | yes |  |  |  |  | Acinetobacter baumannii | 14092 | 58.37 | C. parapsilosis | 89 | 75.81 | none | none | none | |
| matching Pt25.1 | 36 | male | yes | Acinetobacter baumannii | none | none | none |  |  |  |  |  |  |  |  |  | |
| matching Pt25.2 | 39 | male | yes | Negative | none | none | none |  |  |  |  |  |  |  |  |  | |
| Pt26 | 54 | male | no |  |  |  |  | Klebsiella pneumoniae | 7594 | 78.41 | none | none | none | HSV1 | 30 | none | |
| matching Pt26.1 | 52 | male | no | Klebsiella pneumoniae and Stenotrophomonas maltophilia | none | none | none |  |  |  |  |  |  |  |  |  | |
| matching Pt26.2 | 54 | male | no | Negative | none | none | none |  |  |  |  |  |  |  |  |  | |
| Pt27 | 74 | male | no |  |  |  |  | Klebsiella pneumoniae | 10021 | 93.2 | C. tropicalis | 574 | 75.8 | HSV1 | 30 | none | |
| matching Pt27.1 | 74 | male | no | Negative | none | none | none |  |  |  |  |  |  |  |  |  | |
| matching Pt27.2 | 72 | male | no | Negative | EBV | none | none |  |  |  |  |  |  |  |  |  | |
| Pt28 | 68 | female | no |  |  |  |  | Acinetobacter baumannii | 157072 | 97.89 | none | none | none | none | none | none | |
| matching Pt28.1 | 66 | female | no | Acinetobacter baumannii | none | none | none |  |  |  |  |  |  |  |  |  | |
| matching Pt28.2 | 67 | female | no | Negative | none | EBV | none |  |  |  |  |  |  |  |  |  | |
| Pt29 | 77 | male | no |  |  |  |  | P.oralis | 981 | 39.5 | C. tropicalis | 6 | 42.4 | HSV1 | 7 | none | |
| matching Pt29.1 | 76 | male | no | Negative | none | none | none |  |  |  |  |  |  |  |  |  | |
| matching Pt29.2 | 76 | male | no | MSSA | none | none | none |  |  |  |  |  |  |  |  |  | |
| Pt30 | 54 | male | yes |  |  |  |  | Acinetobacter baumannii | 431230 | 94.98 | Aspergillus flavus and Rhizomucor | 5250 and 158 | 78.8 and 3.7 | HSV1 | 545 | none | |
| matching Pt30.1 | 53 | male | yes | Negative | none | none | none |  |  |  |  |  |  |  |  |  | |
| matching Pt30.2 | 53 | male | yes | Negative | CMV | none | none |  |  |  |  |  |  |  |  |  | |
| Pt31 | 22 | female | no |  |  |  |  | Pseudomonas aeruginosa | 3671 | 43.3 | none | none | none | HSV1 | 456 | none | |
| matching Pt31.1 | 24 | female | no | MARSA | none | none | none |  |  |  |  |  |  |  |  |  | |
| matching Pt31.2 | 21 | female | no | Negative | none | none | none |  |  |  |  |  |  |  |  |  | |
| Pt32 | 53 | male | no |  |  |  |  | Acinetobacter baumannii | 1066 | 26.8 | C. parapsilosis | 8 | 25.8 | HSV1 | 66 | none | |
| matching Pt32.1 | 50 | male | no | Acinetobacter baumannii | none | none | none |  |  |  |  |  |  |  |  |  | |
| matching Pt32.2 | 55 | male | no | Klebsiella pneumoniae | none | EBV | none |  |  |  |  |  |  |  |  |  | |
| Pt33 | 76 | female | no |  |  |  |  | staphylococcus aureus | 42 | 2.3 | Aspergillus fumigatus | 101 | 75.8 | none | none | none | |
| matching Pt33.1 | 76 | female | no | Acinetobacter baumannii | none | none | none |  |  |  |  |  |  |  |  |  | |
| matching Pt33.2 | 76 | female | no | Acinetobacter baumannii and Pseudomonas aeruginosa | none | none | none |  |  |  |  |  |  |  |  |  | |
| notes:  Pt: patient; pt1: the first case included in mNGS group; pt1.1: the first case included in CMT paired with Pt1; pt1.2: the second case included in CMT paired with Pt1, and so on. Relative abundance is the percent composition of an organism of a particular kind relative to the total number of organisms in the sample. We did not check the relative abundance of the detected virus. | | | | | | | | | |  |  |  |  |  |  | |
|  |  |  |  |  |  | |
|  |  |  |  |  |  | |
|  |  |  |  |  |  | |
|  |  |  |  |  |  |  |  |  |  |  |  |  |  |  |  |  | |
| **Supplementary Table 2 Inflammatory parameters and imaging changes** | | | | |  |  |  |  |  |  |  |  |  |  |  | |
|  | T0WBC(109) | T0N% | T0CRP(mg/L) | T0PCT(ηg/ml) | T1WBC(109) | T1N% | T1CRP(mg/L) | T1PCT T0PCT(ηg/ml) | T2WBC | T2N% | T2CRP | T2PCT | Radiographic changes |  |  |  | |
| Case |  |  |  |  |  |  |  |  |  |  |  |  |  |  |  |  | |
| Pt1 | 4.85 | 97.2 | 182 | 9.93 | 2.11 | 96.8 | 72.3 | 2.07 | 1.43 | 96.1 | none | 5.17 | improvement |  |  |  | |
| matching Pt1.1 | 14.42 | 95.2 | 75.36 | 1.23 | 22.71 | 94.1 | 254 | 19.29 | 18.66 | 89.9 | none | none | deterioration |  |  |  | |
| matching Pt1.2 | 16.69 | 94.2 | 172.3 | 34.4 | 19.41 | 97 | 169 | 33 | 14.87 | 98.8 | none | none | deterioration |  |  |  | |
| Pt2 | 12.7 | 87.8 | 201.4 | 7.16 | 4.84 | 67.3 | 114.9 | 2.37 | 5.29 | 69 | 97.2 | 0.1 | improvement |  |  |  | |
| matching Pt2.1 | 9.91 | 91.8 | 38.66 | 0.65 | 8.75 | 87.7 | 27.6 | 0.32 | 6.74 | 91.7 | 17 | 0.21 | improvement |  |  |  | |
| matching Pt2.2 | 8.82 | 77.1 | 67.2 | 23.9 | 11.6 | 70.5 | 22.1 | 24.6 | none | none | none | none | deterioration |  |  |  | |
| Pt3 | 1.43 | 70.8 | 189 | 44.89 | 6.51 | 82.8 | 143 | 4.92 | 19.9 | 93.4 | 52.44 | 1.28 | improvement |  |  |  | |
| matching Pt3.1 | 9.47 | 93.9 | 22.48 | 21.7 | 9.25 | 75.8 | 13.6 | 14.9 | 13.19 | 86 | 22 | 3.27 | no change |  |  |  | |
| matching Pt3.2 | 19.34 | 96 | 301.8 | 80.71 | 12.61 | 89.2 | 74.6 | 19.47 | 14.38 | 87.9 | 93.9 | 3.81 | deterioration |  |  |  | |
| Pt4 | 9.29 | 86.3 | 150.4 | 12.28 | 5.15 | 93.8 | 208.7 | 20.98 | 10.82 | 90.9 | 110.4 | 21.04 | no change |  |  |  | |
| matching Pt4.1 | 12.6 | 93 | 177.1 | 1.15 | 7.69 | 78.5 | no | 1.12 | 6.5 | 74.1 | 32.78 | 0.204 | improvement |  |  |  | |
| matching Pt4.2 | 23.66 | 74.6 | 68.7 | 14.8 | 44.8 | 98.2 | 139 | >100 | 24.76 | 87.2 | none | none | deterioration |  |  |  | |
| Pt5 | 6.08 | 77.8 | 68.96 | 2.7 | 6.85 | 79.8 | none | 0.63 | 7.68 | 75.5 | 71.4 | 0.9 | improvement |  |  |  | |
| matching Pt5.1 | 6.86 | 89.7 | 2.11 | 10.69 | 7.02 | 86.2 | 12.5 | 0.58 | 5.97 | 83.7 | none | none | improvement |  |  |  | |
| matching Pt5.2 | 5.59 | 96 | 324 | >100 | 1.67 | 84 | 363 | 95.4 | none | none | none | none | deterioration |  |  |  | |
| Pt6 | 11.34 | 85.7 | 89.96 | 2.65 | 11.1 | 79.6 | 55.58 | 0.82 | 9.22 | 80.6 | 40.36 | 0.38 | improvement |  |  |  | |
| matching Pt6.1 | 9 | 92.8 | 68.4 | 7.56 | 6.46 | 79 | 24.2 | 4.3 | 6.1 | 69 | 12.83 | 0.76 | improvement |  |  |  | |
| matching Pt6.2 | 14.74 | 87.4 | 138 | 7.42 | 14.15 | 86.89 | 128 | 6.92 | 13.89 | 78.1 | 96.8 | 4.26 | no change |  |  |  | |
| Pt7 | 12.31 | 78 | 64.05 | 1.25 | 12.75 | 74.9 | 23.21 | 0.12 | 8.44 | 67.5 | 8.85 | 0.2 | improvement |  |  |  | |
| matching Pt7.1 | 6.39 | 85.8 | 72.8 | 4.26 | 5.38 | 80.9 | 42.8 | 1.26 | 3.4 | 71.4 | 21.2 | 0.26 | improvement |  |  |  | |
| matching Pt7.2 | 7.71 | 87.4 | 36.7 | 2.32 | 5.4 | 73.6 | 21.4 | 1.21 | 3.17 | 42 | 12.46 | 0.17 | improvement |  |  |  | |
| Pt8 | 6.4 | 77.2 | 163.09 | 0.22 | 5.58 | 83.5 | none | none | 5.64 | 81.5 | 104.35 | 0.45 | improvement |  |  |  | |
| matching Pt8.1 | 9.51 | 81.6 | 120.52 | 0.11 | 10 | 90 | 100.12 | 0.2 | 8.12 | 79.5 | 55.94 | 0.34 | improvement |  |  |  | |
| matching Pt8.2 | 20.13 | 94.6 | 139.8 | 46.3 | 11.59 | 90.7 | none | none | 10.44 | 78.4 | 127.3 | 37.1 | no change |  |  |  | |
| Pt9 | 8.08 | 84 | 314.56 | 3.6 | 12.98 | 82.4 | 153.37 | 0.982 | 7.61 | 79.2 | 53.47 | 0.75 | improvement |  |  |  | |
| matching Pt9.1 | 14.81 | 71.5 | 103.19 | 0.56 | 13.28 | 59.6 | 12.06 | 0.28 | 12.23 | 58.7 | 7.24 | 0.2 | improvement |  |  |  | |
| matching Pt9.2 | 19.96 | 96.9 | 367.23 | 1.49 | 23.63 | 97.1 | 324.67 | 5.73 | 18.49 | 94.8 | none | 50.17 | deterioration |  |  |  | |
| Pt10 | 9.91 | 98.1 | 96.1 | 14.49 | 3.82 | 94.5 | 250.9 | 4.15 | 1.72 | 93.2 | 302.2 | 15.34 | improvement |  |  |  | |
| matching Pt10.1 | 8.2 | 89.2 | 195 | 8.34 | 3.84 | 84.9 | 207.4 | 12.34 | none | none | none | none | deterioration |  |  |  | |
| matching Pt10.2 | 3.71 | 94.9 | 96.35 | 9.84 | 3.72 | 93.5 | 102.96 | 9.49 | 1.32 | 90.9 | none | 14.07 | deterioration |  |  |  | |
| Pt11 | 16.34 | 92.69 | 78.1 | 7.43 | 15.89 | 94.7 | 61.21 | 2.13 | none | none | none | none | deterioration |  |  |  | |
| matching Pt11.1 | 11.14 | 87.19 | 25.26 | 6.9 | 17.64 | 91.1 | 6.77 | 0.67 | 12.59 | 91.9 | 65.48 | 1.69 | no change |  |  |  | |
| matching Pt11.2 | 16.82 | 95.2 | 96.17 | 3.22 | 10.46 | 84.9 | 62.47 | 1.28 | 9.57 | 81.9 | none | 0.28 | improvement |  |  |  | |
| Pt12 | 14.22 | 95.49 | 161.8 | 7.26 | 4.27 | 89.4 | 95.8 | 4.18 | 7.73 | 90.9 | 97.3 | 2.16 | improvement |  |  |  | |
| matching Pt12.1 | 9.31 | 79.89 | 120.43 | 4.06 | 10.34 | 74.3 | 32.16 | 1.77 | 9.56 | 86.1 | 21.19 | 0.02 | improvement |  |  |  | |
| matching Pt12.2 | 11.96 | 94.4 | 224 | >100 | 3.15 | 83.5 | 122 | 55.67 | 6.99 | 68.8 | 24.73 | 2.67 | improvement |  |  |  | |
| Pt13 | 21.91 | 95.5 | 54.9 | 1.87 | 25.24 | 98.1 | 139.46 | 12.73 | none | none | none | none | deterioration |  |  |  | |
| matching Pt13.1 | 23.23 | 89 | 383.58 | 29.46 | 13.92 | 87.5 | 339.35 | 7.28 | 12.54 | 86.4 | 156.9 | 0.802 | improvement |  |  |  | |
| matching Pt13.2 | 19.51 | 90.2 | 66.19 | 4384 | 12.49 | 80.45 | 18.45 | 0.495 | 13.89 | 85.8 | 6.24 | 0.02 | improvement |  |  |  | |
| Pt14 | 2.87 | 88.6 | 167.5 | 4.76 | 5.87 | 84.3 | 40.2 | 1.22 | 4.17 | 89.5 | 32.1 | 1.11 | improvement |  |  |  | |
| matching Pt14.1 | 13.95 | 96.79 | 135.66 | 11.1 | 13.19 | 95.7 | 249.89 | 2.55 | 11.55 | 96.4 | 170.47 | 6.04 | no change |  |  |  | |
| matching Pt14.2 | 5.1 | 91.39 | 126.06 | 12.71 | 4.52 | 56.6 | 96.4 | 7.28 | 2.19 | 65.4 | 27.3 | 2.16 | improvement |  |  |  | |
| Pt15 | 24.25 | 78.3 | 283.68 | 1.63 | 39.34 | 87 | 317.23 | 4.28 | 28.69 | 85.4 | 298.71 | 4.32 | no change |  |  |  | |
| matching Pt15.1 | 15.18 | 86.8 | 72.8 | 3.4 | 13.85 | 82.5 | 67.2 | 2.18 | 11.93 | 84.8 | 47.66 | 2.96 | no change |  |  |  | |
| matching Pt15.2 | 10.34 | 75.5 | 42.15 | 1.88 | 15.48 | 84.1 | 270.86 | 0.768 | 16.13 | 83.5 | 145.5 | 1.56 | improvement |  |  |  | |
| Pt16 | 24 | 95.8 | 361.1 | 4.82 | 15.73 | 93.7 | 146.7 | 39.68 | none | none | none | none | deterioration |  |  |  | |
| matching Pt16.1 | 5.92 | 88.7 | 70.75 | 2.24 | 5.36 | 83 | 64.5 | 2.2 | 4.28 | 86 | 27.4 | 1.7 | no change |  |  |  | |
| matching Pt16.2 | 27.34 | 94.69 | 342.1 | 2.79 | 25.63 | 96.3 | 327.2 | 3.19 | none | none | none | none | deterioration |  |  |  | |
| Pt17 | 9.03 | 93.8 | 372.89 | 9.35 | 13.49 | 94.9 | 245.45 | 92.6 | none | none | none | none | deterioration |  |  |  | |
| matching Pt17.1 | 7.72 | 81.8 | 62.4 | 2.37 | 7.23 | 63.1 | 24.45 | 1.27 | 4.75 | 62.1 | 12.47 | 0.25 | no change |  |  |  | |
| matching Pt17.2 | 9.41 | 91.4 | 327.1 | 33.71 | 2.6 | 79.2 | 270.8 | 4.43 | 3.52 | 73 | 120.49 | 1.63 | improvement |  |  |  | |
| Pt18 | 7.52 | 79.9 | 116.87 | 7.3 | 13.98 | 97.4 | 84.2 | 2.6 | 12.15 | 93.1 | 27.4 | 1.26 | improvement |  |  |  | |
| matching Pt18.1 | 9.5 | 97.5 | 147.55 | 3.75 | 4.07 | 87.4 | 54.48 | 2.63 | none | none | none | none | deterioration |  |  |  | |
| matching Pt18.2 | 7.43 | 96.2 | 312.76 | 1.95 | 9.67 | 95.5 | 84.7 | 2.73 | 10.42 | 92.5 | 37.23 | 1.24 | improvement |  |  |  | |
| Pt19 | 10.95 | 83.39 | 99.42 | 2.36 | 25.41 | 87 | 97.67 | 1.03 | none | none | none | none | deterioration |  |  |  | |
| matching Pt19.1 | 22.98 | 84.3 | 276.4 | 10.1 | 10.58 | 78.7 | 172.63 | 2.41 | 9.94 | 76 | 201.6 | 2.53 | no change |  |  |  | |
| matching Pt19.2 | 16.69 | 93.99 | 157.71 | 3.25 | 8.38 | 83.69 | 140.39 | 1.27 | 8.25 | 83.3 | 94.7 | 1.27 | no change |  |  |  | |
| Pt20 | 7.7 | 78.69 | 138 | 2.06 | 13.52 | 92 | 176.4 | 2.82 | 10.78 | 89 | 252.29 | 0.98 | improvement |  |  |  | |
| matching Pt20.1 | 12.22 | 94.59 | 127.26 | 40.2 | 13.66 | 93.6 | 99.1 | 37.77 | 16.03 | 94.1 | 136.4 | 45.27 | deterioration |  |  |  | |
| matching Pt20.2 | 14.88 | 87.3 | 131.02 | 6.07 | 15.96 | 92.4 | 174.5 | 10.85 | none | none | none | none | deterioration |  |  |  | |
| Pt21 | 9.45 | 90.59 | 71.6 | 2.36 | 15.2 | 92.6 | 141.5 | 1.2 | 16.21 | 92.5 | 83.2 | 10.11 | no change |  |  |  | |
| matching Pt21.1 | 5.92 | 88.9 | 117.19 | 2.4 | 7.37 | 85.3 | 103.28 | 1.86 | 10.37 | 88.7 | 74.32 | 0.96 | improvement |  |  |  | |
| matching Pt21.2 | 17.91 | 95.3 | 168 | 2.3 | 17.83 | 96 | 155 | 10.23 | none | none | none | none | deterioration |  |  |  | |
| Pt22 | 25.74 | 84.9 | 85.5 | 1.8 | 37.59 | 70.4 | 48.2 | 1.36 | none | none | none | none | deterioration |  |  |  | |
| matching Pt22.1 | 19.29 | 85.3 | 150 | 2.26 | 29.41 | 90.1 | 65.22 | 1.54 | 16.2 | 91.6 | 172.26 | 3.41 | deterioration |  |  |  | |
| matching Pt22.2 | 8.66 | 85 | 68.63 | 16.27 | 7.55 | 89.3 | 51.79 | 1.33 | 7.04 | 92.6 | 29.87 | 0.76 | improvement |  |  |  | |
| Pt23 | 4.86 | 90.9 | 183.4 | 5.56 | 13.56 | 95.7 | 79.4 | 2.4 | 12.14 | 94.3 | 92 | 4.16 | no change |  |  |  | |
| matching Pt23.1 | 16.86 | 78.29 | 217.6 | 12.27 | 9.62 | 75.7 | 143.27 | 2.82 | 8.6 | 65.7 | 73.19 | 3.59 | no change |  |  |  | |
| matching Pt23.2 | 11.5 | 88 | 76.26 | 1.58 | 10.73 | 79.2 | 33.05 | 1.24 | 8.13 | 82.4 | 84.62 | 0.79 | improvement |  |  |  | |
| Pt24 | 7.55 | 88.8 | 261.91 | 10.52 | 5.07 | 80.1 | 124.81 | 2.24 | 4.91 | 76.2 | 186.81 | 3.76 | improvement |  |  |  | |
| matching Pt24.1 | 15.77 | 93.1 | 162 | 3.25 | 9.95 | 85.3 | 34.3 | 2.23 | 9.1 | 84.3 | 18.9 | 1.65 | improvement |  |  |  | |
| matching Pt24.2 | 11 | 90.1 | 142.59 | 7.34 | 10.41 | 71.8 | 137.62 | 2.56 | 9.25 | 68.9 | 78.45 | 2.2 | no change |  |  |  | |
| Pt25 | 5.59 | 85.9 | 125 | 10.31 | 11.01 | 90 | 214.3 | 3.91 | 6.06 | 88.4 | 95.4 | 2.06 | improvement |  |  |  | |
| matching Pt25.1 | 6.37 | 83.7 | 136 | 1.38 | 8.22 | 92.5 | 195 | 8.34 | 3.84 | 84.9 | 167.8 | 7.45 | no change |  |  |  | |
| matching Pt25.2 | 11.65 | 91.2 | 44.67 | 2.35 | 15.38 | 89.2 | 62.28 | 1.76 | 17.48 | 90.2 | 38.29 | 2.21 | no change |  |  |  | |
| Pt26 | 16.02 | 77.6 | 283.77 | 1.79 | 21.83 | 86.6 | 234.67 | 0.532 | 19.19 | 90 | 112.75 | 0.579 | improvement |  |  |  | |
| matching Pt26.1 | 8.5 | 81.6 | 103 | 3.38 | 12.75 | 85 | 57.52 | 0.54 | 11.36 | 86.9 | 21.2 | 0.43 | no change |  |  |  | |
| matching Pt26.2 | 10.11 | 79.4 | 157.61 | 1.11 | 12.98 | 81.2 | 163.89 | 1.07 | none | none | none | none | deterioration |  |  |  | |
| Pt27 | 9.15 | 83.1 | 143.78 | 11.26 | 11.28 | 92.4 | 156.23 | 10.78 | 10.43 | 90.26 | 127.83 | 13.46 | no change |  |  |  | |
| matching Pt27.1 | 10.97 | 91.8 | 256.96 | 1.563 | 12.63 | 94.43 | 273.42 | 2.41 | 11.57 | 92.4 | 264 | 1.78 | deterioration |  |  |  | |
| matching Pt27.2 | 13.2 | 87.1 | 121.5 | 1.56 | 11.28 | 79.4 | 44.9 | 0.25 | 9.41 | 70.5 | 21.6 | 0.02 | improvement |  |  |  | |
| Pt28 | 13.17 | 96 | 128.5 | 2.22 | 10.43 | 97.1 | 273.42 | 1.25 | 8.43 | 96.3 | 212.56 | 2.13 | no change |  |  |  | |
| matching Pt28.1 | 23.79 | 84.8 | 168.41 | 3.65 | 14.33 | 87.6 | 149.26 | 2.78 | 12.1 | 71.8 | 120.18 | 2.56 | no change |  |  |  | |
| matching Pt28.2 | 16.72 | 89.1 | 109 | 2.14 | 20.54 | 94.6 | 114.8 | 1.13 | 17.63 | 92.7 | 105.4 | 1.27 | no change |  |  |  | |
| Pt29 | 15.92 | 80.7 | 90.16 | 1.24 | 11.2 | 70.5 | 25.41 | 0.78 | 12.71 | 79.2 | 41.4 | 0.26 | improvement |  |  |  | |
| matching Pt29.1 | 8.18 | 88.9 | 81.7 | 2.91 | 15.37 | 89.1 | 170 | 2.97 | 13.12 | 85 | 126.2 | 1.64 | no change |  |  |  | |
| matching Pt29.2 | 8.84 | 71.6 | 92.6 | 1.26 | 17.2 | 94.7 | 126.4 | 5.82 | 9.12 | 76.6 | 78.4 | 2.73 | no change |  |  |  | |
| Pt30 | 8.04 | 95.9 | 281 | 24.09 | 9.37 | 97.3 | 286 | 13.46 | 27.16 | 96.6 | 182.33 | 86.86 | deterioration |  |  |  | |
| matching Pt30.1 | 3.26 | 80.8 | 389 | >100 | 6.03 | 93.05 | 309.26 | 73.69 | 9.11 | 92.5 | 278.29 | 78.4 | deterioration |  |  |  | |
| matching Pt30.2 | 2.64 | 91.6 | 175 | 3.2 | 11.01 | 83.8 | 164.7 | 1.69 | none | none | none | none | deterioration |  |  |  | |
| Pt31 | 6.52 | 87.3 | 79.28 | 1.73 | 12.7 | 91.1 | 83.76 | 0.326 | 8.79 | 79.5 | 34 | 0.337 | improvement |  |  |  | |
| matching Pt31.1 | 10.62 | 77.1 | 77 | 2.92 | 9.25 | 68.5 | 17.9 | 1.08 | 6.4 | 63.9 | 4.61 | 0.21 | improvement |  |  |  | |
| matching Pt31.2 | 10.25 | 87.6 | 78.4 | 2.49 | 12.75 | 80 | 42.4 | 1.26 | 10.97 | 77.7 | 38 | 0.06 | improvement |  |  |  | |
| Pt32 | 2.33 | 77.8 | 31.46 | 1.3 | 3.56 | 72.9 | 24.42 | 0.76 | 4.26 | 63.7 | 17.37 | 0.24 | improvement |  |  |  | |
| matching Pt32.1 | 14.4 | 82.5 | 169.53 | 2.76 | 8.52 | 79.4 | 143 | 1.27 | 7.53 | 79.2 | 78.24 | 0.71 | no change |  |  |  | |
| matching Pt32.2 | 9.61 | 84.9 | 130.16 | 2.78 | 12.68 | 73.3 | 78.4 | 1.69 | 10.4 | 72.4 | 27.6 | 0.37 | improvement |  |  |  | |
| Pt33 | 16.4 | 88.2 | 56.6 | 2.63 | 13.76 | 86.8 | 29.5 | 1.03 | 7.97 | 78.15 | 18 | 1.1 | improvement |  |  |  | |
| matching Pt33.1 | 7.87 | 78.1 | 124.2 | 13.62 | 3.38 | 69.4 | 78.2 | 7.36 | 4.62 | 70.4 | 52.36 | 2.43 | no change |  |  |  | |
| matching Pt33.2 | 17.35 | 92 | 240.95 | 28.22 | 21.39 | 91.9 | 153.17 | 8.28 | 23.06 | 91.8 | 123.4 | 5.75 | no change |  |  |  | |
| notes:  Pt: patient; pt1: the first case included in mNGS group; pt1.1:the first case included in CMT paired with Pt1; pt1.2: the second case included in CMT paired with Pt1, and so on. Microbiological data of the two groups are provided in Supplementary Table 1. Lung CT and inflammatory parameters are provided in Supplementary Table 2. The time points for the first collection of those data are 1-2 days before the return of etiological results(T0), and the time points for the next two collection are 3-5 days(T1) and 7-8 days(T2) after the return results, respectively. If a patient died during this time, it was marked as NONE. Imaging data were obtained on the day of diagnosis of HAP/VAP and 7 – 10 days after the etiological results were obtained. Two senior radiologists judged two CTs, respectively, which were defined as improvement if both judged the lesion was absorbed, deterioration if both judged the progression, no change if the opinion was inconsistent, deterioration if the patient died during this period. | | | | | | | | | | | | |  |  |  | |
|  |  |  | |
|  |  |  | |
|  |  |  | |
|  |  |  | |
|  |  |  | |
|  |  |  | |
|  |  |  |  |  |  |  |  |  |  |  |  |  |  |  |  |  | |
